# Supplementary material
Source: PubMed Central journal article supplement (PMC5543758)
Supplement: NIHMS879075-supplement-appendix.pdf [file NIHMS879075-supplement-appendix.pdf]

# Technical Appendix for “Systematic Review, Meta-Analysis, and Cost Effectiveness of Treatment of Latent Tuberculosis Infection to Reduce Progression to Multidrug-Resistant Tuberculosis”

## Additional Methods

### *Systematic Review*

Our population, intervention, comparison, and outcome (PICO) question was: “Among contacts to infectious MDR TB patients with LTBI or presumed LTBI, should LTBI treatment compared with no medical treatment be used?” Populations included all persons with LTBI or presumed LTBI (children < 5 years of age or living with HIV) having contact to infectious MDR TB. Sub-analyses were conducted for children. The intervention was MDR LTBI treatment for 6-12 months with an effective treatment regimen ( $\geq$  one medication to which their presumed MDR-LTBI strain was likely susceptible). The comparison was no effective MDR LTBI treatment. Outcomes examined were: TB incidence; MDR LTBI treatment completion; MDR LTBI treatment discontinuation due to adverse effects, overall, by age, by regimen; and cost effectiveness of MDR LTBI treatment regimens.

The systematic review of published studies in English or Spanish was conducted for the period 1/1/1994-12/31/2014 through a search of PubMed, EMBASE, and the Cochrane Library for the key words: tuberculosis, multidrug resistant, contacts, and treatment. We excluded case reports with  $N < 10$  and studies only reporting on the diagnosis or treatment of MDR-TB disease. We considered that persons having contact to infectious MDR-TB disease were effectively treated if they received one or more medications to which their MDR-TB strain was likely susceptible.

### *Cost Effectiveness*

To assess incremental cost-effectiveness of individual regimens, we conducted a decision analysis of a hypothetical cohort of contacts of patients with infectious MDR TB who have MDR LTBI over a 40-year (estimated average remaining lifetime) analytic horizon from the societal perspective. A simple decision analysis was chosen because contacts to MDR TB with MDR LTBI are a closed cohort and transitions occur typically once. This analysis uses many of the same inputs that Holland [23] used in his Markov cohort model, and updates them with regimen-specific adverse event rates and treatment completion rates.

We assumed 100 MDR TB patients per year over 40 years for a total cohort of 4000, approximately half of whom have infectious forms of disease (pulmonary sputum smear positive or sputum smear negative culture positive disease) [25]. We estimated approximately 20 contacts per infectious MDR TB patient [26].

We assumed that 100% of MDR TB contacts started MDR LTBI treatment, and applied regimen-specific average completion rates and adverse event discontinuation rates from our review (Table 4 in the main paper). We used regimen-specific efficacy estimates from mouse models published by Nuermberger [27] and Holland [23], since clinical trials of MDR LTBI regimens have not yet been conducted among humans (Table 4 in the main paper). For those who discontinued due to adverse events, we estimated that 0.5% of those

starting treatment were hospitalized, based on historical rates of isoniazid-related hospitalization [28]. We assumed that approximately 7% die from MDR TB [29] and 1% die from all causes [30]. For untreated contacts, we assumed an LTBI progression to TB rate of 3% over 40 years (assuming an average age of LTBI of 39 and 40 years of remaining life with average age of expected death at age 79) from Yeats [31]. We applied a range of remaining lifetime TB incidence of 2.4% to 4.4% (see power calculation details below, incidence in year one of 1.15% from Ferebee, followed by annual reactivation estimates of 0.032% from Walter and 0.084% from Shea.

We applied MDR-TB societal costs in 2014 dollars, excluding lost productivity due to deaths, from Castro [29] (\$225,398), along with 9-month MDR LTBI treatment costs, including those of lab monitoring, in 2009 dollars used by Holland [23] (PZA/FQ=\$1719, PZA/EMB=\$1165, FQ alone=\$1261, FQ/EMB=\$1634, FQ/ETA=\$3635; for no treatment, costs were taken for monitoring for 24 months=\$888) updated to 2014 dollars (\$1993, \$1350, \$1461, \$1893, \$4213, \$1029, respectively) using the medical care component of the consumer price index [33] (multiplied by 1.1589). We estimated that patients not completing LTBI treatment would incur one-third of the costs of the full regimen. TB cases and costs were discounted at 3% annually over the 40 year analytic horizon.

We used the following quality-adjusted life year (QALY) estimates from Gao [34] and from Holland [23]: 0.53 alive post MDR TB, 0.90 alive with MDR LTBI, 0.80 alive with MDR LTBI post adverse effect treatment stop, and 0.75 alive with MDR LTBI post hospitalization for adverse effect treatment stop.

One-way sensitivity analyses were conducted to assess the effect of increasing adverse effects by 50% with each regimen. Figure 1 presents the decision tree with state transition probabilities.

## Additional Results

### *TB incidence from Studies Comparing MDR LTBI Treatment with No Effective Treatment*

TB incidence from five of six comparison studies (excluding the Attamna registry match) were: 98% (Bamrah [1]), 17% (Denholm [2]), 76% (Schaaf[3], 79% (Adler-Shohet[4]), 47% (Williams [6]).

| MDR LTBI TB Incidence Person-months Data |     |    |               |        |        |               |                   |
|------------------------------------------|-----|----|---------------|--------|--------|---------------|-------------------|
| Study                                    | n   | TB | Treatment     |        | Months | Person months | Ln(person months) |
|                                          |     |    | Tx=0, no Tx=1 | Ln(n)  |        |               |                   |
| Bamrah                                   | 104 | 0  | 0             | 4.6444 | 36     | 3744          | 8.2279            |
| Bamrah                                   | 15  | 3  | 1             | 2.7081 | 36     | 540           | 6.2916            |
| Denholm                                  | 11  | 0  | 0             | 2.3979 | 54     | 594           | 6.3869            |
| Denholm                                  | 38  | 2  | 1             | 3.6376 | 56.4   | 2143.2        | 7.6701            |
| Schaaf                                   | 41  | 2  | 0             | 3.7136 | 30     | 1230          | 7.1148            |
| Schaaf                                   | 64  | 13 | 1             | 4.1589 | 30     | 1920          | 7.5601            |
| Adler                                    | 26  | 0  | 0             | 3.2581 | 24     | 624           | 6.4362            |
| Adler                                    | 5   | 0  | 1             | 1.6094 | 24     | 120           | 4.7875            |
| Williams                                 | 8   | 0  | 0             | 2.0794 | 24     | 192           | 5.2575            |
| Williams                                 | 4   | 0  | 1             | 1.3863 | 24     | 96            | 4.5643            |

The reduction in MDR TB incidence was found using several methods (a 91%-92% risk reduction controlling for person-time using Poisson regression alone or controlling for zero-inflation and random effects) to analyze count data with multiple zero outcomes. However, the best fit was a negative binomial model that controlled for person-time and over-dispersion that found a 90% risk reduction, but with a very wide confidence interval (9% to 99%). Analysis results using SAS version 9.3 are presented below for each model.

### Results of Poisson Regression with Person-time as an Offset

#### Criteria For Assessing Goodness Of Fit

| Criterion                | DF | Value    | Value/DF |
|--------------------------|----|----------|----------|
| Deviance                 | 8  | 18.8880  | 2.3610   |
| Scaled Deviance          | 8  | 18.8880  | 2.3610   |
| Pearson Chi-Square       | 8  | 18.9085  | 2.3636   |
| Scaled Pearson X2        | 8  | 18.9085  | 2.3636   |
| Log Likelihood           |    | 9.9688   |          |
| Full Log Likelihood      |    | -15.7615 |          |
| AIC (smaller is better)  |    | 35.5229  |          |
| AICC (smaller is better) |    | 37.2372  |          |
| BIC (smaller is better)  |    | 36.1281  |          |

Algorithm converged.

#### Analysis Of Maximum Likelihood Parameter Estimates

| Parameter | DF | Estimate | Standard Error | Likelihood Ratio | 95% Confidence Limits | Wald Chi-Square | Pr > ChiSq |
|-----------|----|----------|----------------|------------------|-----------------------|-----------------|------------|
| Intercept | 1  | -3.1116  | 0.8498         | -4.6454          | -1.1455               | 13.41           | 0.0003     |
| treatment | 1  | -2.4784  | 0.7454         | -4.3173          | -1.2359               | 11.06           | 0.0009     |
| Scale     | 0  | 1.0000   | 0.0000         | 1.0000           | 1.0000                |                 |            |

NOTE: The scale parameter was held fixed.

Using Poisson regression, the RR of TB incidence, adjusted for study person-time, is 0.0839 with confidence interval (CI) of 0.0133-0.2906.

### Results of Zero-Inflation Poisson (ZIP) Regression with Random Intercept and Random Effects and Person-time as an Offset, b0=intercept, b1=treatment, c0=zero inflation, s2u2=random effects

NOTE: GCONV convergence criterion satisfied.

#### Fit Statistics

|                          |      |
|--------------------------|------|
| -2 Log Likelihood        | 25.6 |
| AIC (smaller is better)  | 33.6 |
| AICC (smaller is better) | 41.6 |
| BIC (smaller is better)  | 32.1 |

Parameter Estimates

| Parameter | Estimate | Standard Error | DF | t Value | Pr >  t | Alpha | Lower   | Upper   | Gradient |
|-----------|----------|----------------|----|---------|---------|-------|---------|---------|----------|
| b0        | -3.5589  | 1.0626         | 4  | -3.35   | 0.0286  | 0.05  | -6.5092 | -0.6086 | 4.357E-6 |
| b1        | -2.4396  | 0.7873         | 4  | -3.10   | 0.0363  | 0.05  | -4.6255 | -0.2537 | 0.000051 |
| c0        | -17.2689 | 6553.05        | 4  | -0.00   | 0.9980  | 0.05  | -18211  | 18177   | 2.329E-8 |
| s2u2      | 0.5860   | 0.6625         | 4  | 0.88    | 0.4263  | 0.05  | -1.2534 | 2.4254  | -0.00005 |

Using ZIP regression with random effects, the RR of TB incidence, adjusted for study person-time, is 0.0872 with CI of 0.0098-0.7759.

**Results of Negative Binomial Regression with Person-time as an Offset**

Criteria For Assessing Goodness Of Fit

| Criterion                | DF | Value    | Value/DF |
|--------------------------|----|----------|----------|
| Deviance                 | 8  | 8.4235   | 1.0529   |
| Scaled Deviance          | 8  | 8.4235   | 1.0529   |
| Pearson Chi-Square       | 8  | 7.7439   | 0.9680   |
| Scaled Pearson X2        | 8  | 7.7439   | 0.9680   |
| Log Likelihood           |    | 12.5474  |          |
| Full Log Likelihood      |    | -13.1828 |          |
| AIC (smaller is better)  |    | 32.3657  |          |
| AICC (smaller is better) |    | 36.3657  |          |
| BIC (smaller is better)  |    | 33.2734  |          |

Algorithm converged.

Analysis Of Maximum Likelihood Parameter Estimates

| Parameter  | DF | Estimate | Standard Error | Likelihood Ratio 95% Confidence Limits |         | Wald Chi-Square | Pr > ChiSq |
|------------|----|----------|----------------|----------------------------------------|---------|-----------------|------------|
| Intercept  | 1  | -3.3527  | 1.3052         | -6.3542                                | -0.3696 | 6.60            | 0.0102     |
| treatment  | 1  | -2.2734  | 0.9853         | -4.4436                                | -0.0935 | 5.32            | 0.0210     |
| Dispersion | 1  | 0.6560   | 0.7332         | 0.0293                                 | 5.1318  |                 |            |

NOTE: The negative binomial dispersion parameter was estimated by maximum likelihood.

Using negative binomial regression to account for the dispersion of the data, the RR of TB incidence, adjusted for study person-time, is 0.1030 with CI of 0.0118-0.9107.

### *TB Incidence in Studies of Treatment-only or No Treatment*

TB incident relative risk reductions from two of 10 treatment-only studies, excluding six studies without data on incidence, the Feja registry match, and Miramontes that didn't describe follow-up procedures and had extensive (48%) lost to follow-up were: Garcia-Prats 0% (0%-14%) [9], Seddon 3% (1%-7%) [15]. Aggregated incidence from the two studies was  $6/210 = 3\%$ .

TB incidence in five no-effective-MDR-LTBI-treatment studies were: Amanullah 3% (0.4%-11%) [17], Bayona 1% (0.3%-2%) [18], Becerra 5% (4%-7%) [19], Kritski 8% (5%-13%) [20], Nitta 5% (1%-14%) [21]. Aggregated incidence from the five studies was  $94/2554 = 4\%$ .

Limitations of these findings include: There were very few published studies that addressed the PICO question, and there could have been publication bias towards publishing of studies having a treatment effect

- Studies were prospective observational, retrospective reviews, case series  $N > 10$ , or registry matches
- In meta-analyses, we excluded registry matches (Attamna, Feja) because their limitations include a much greater likelihood of loss to follow up
- Periods of follow up to identify incident cases varied from 30 months to 6 years in the 3 comparison studies having any TB incidence. In the 2 additional comparison (non-registry match) studies having no TB incidence, follow up was 2 years or less. Power to detect TB incidence was only 1% in these 2 studies (Adler-Shohet and Williams).

**Forest Plot of TB Incidence Proportion: 2 Treatment-only Studies and 5 No Treatment Studies**

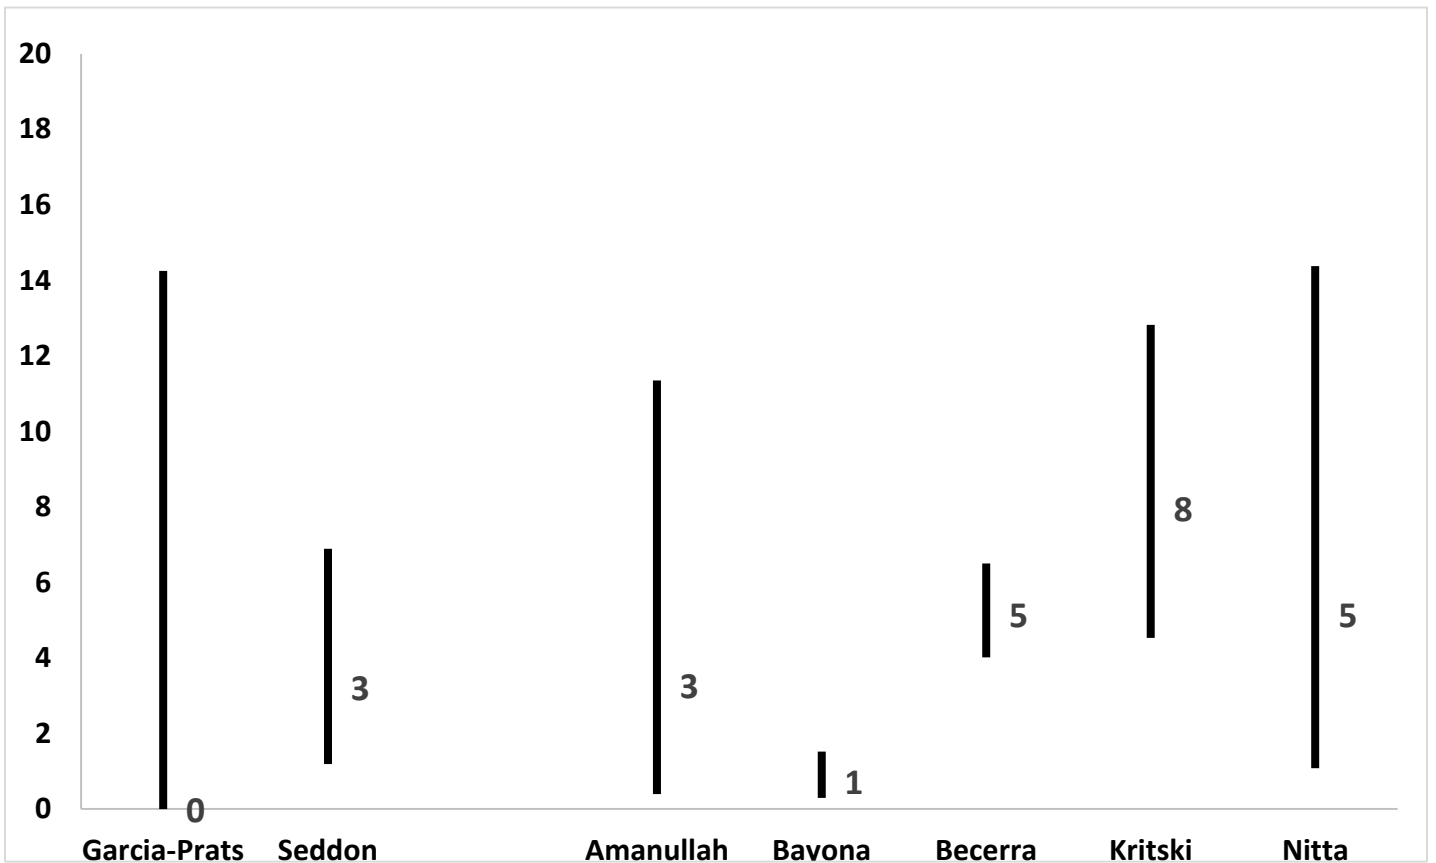

*MDR LTBI Treatment Completion*

Thirteen studies reported MDR LTBI treatment completion:

- Bamrah [1] 93/104=89% (81.9-94.6)
- Denholm [2] 9/11=82% (48.2-97.7)
- Schaaf [3] 41/41=100% (91.4-100)
- Adler-Shohet [4] 15/26=58% (36.9-76.6)
- Williams [6] 8/8=100% (63.1-100)
- Feja [7] 38/51=75% (60.4-85.7)
- Garcia-Prats [9] 21/24=88% (67.6-97.3)
- Horn [10] 2/16=13% (1.6-38.4)
- Lou [11] 13/48=27% (15.3-41.8)
- Miramontes [12] 44/87=51% (40.3-60.8)
- Papastavros[13] 0/17=0% (0-19.5)
- Ridzon [14] 9/22=41% (20.7-63.6)
- Seddon [15] 141/186=76% (69-81.8)

The pooled average MDR LTBI treatment completion from the 13 studies was 68% (434/641, CI=64.0%-71.2%). However, the studies were too heterogeneous for random effects aggregation. Limitations of these findings were that MDR LTBI treatment completion depended on the regimen, because adverse effects influenced treatment discontinuation.

**Forest Plot of MDR TB Treatment Completion Proportions: 13 Studies**

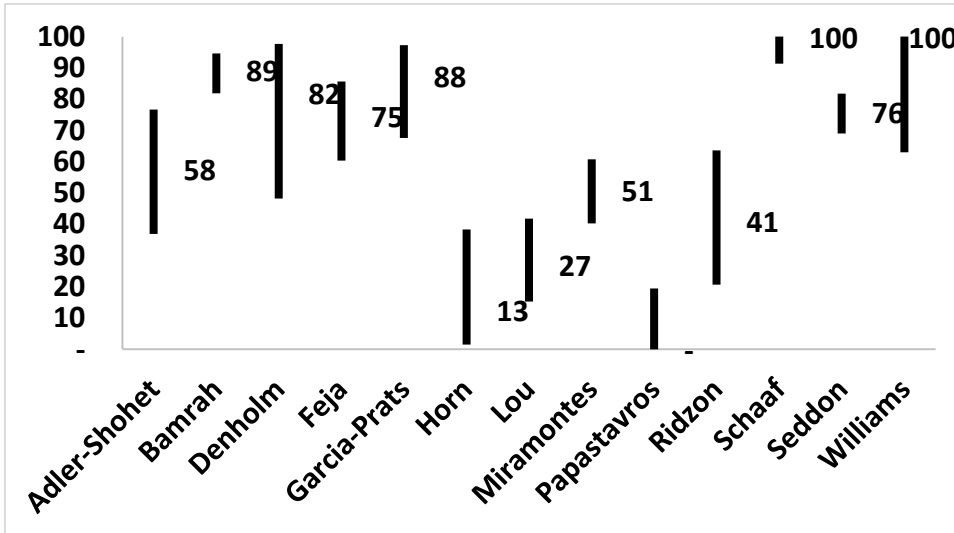

*Treatment Discontinuation due to Adverse Effects*

Twelve studies reported the overall percentage of persons starting MDR LTBI treatment who discontinued due to adverse effects:

- Adler-Shohet [4]                      11/26=42%      (23.4-63.1)
- Bamrah [1]                              4/104=4%      (1.1-9.6)
- Denholm [2]                            2/11=18%      (2.3-51.8)
- Schaaf [3]                                0/41=0%      (0-8.6)
- Feja [7]                                    5/51=10%      (3.3-21.4)
- Garcia-Prats [9]                        2/24=8%      (1.03-27.0)
- Horn [10]                                13/16=81%      (54.4-96.0)
- Lou [11]                                  32/48=67%      (51.6-79.6)
- Papastavros [13]                        17/17=100%    (80.5-100.0)
- Ridzon [14]                               13/22=59%      (36.4-79.3)
- Seddon [15]                               0/186=0%      (0-2.0)
- Younossian [16]                        7/12=58%      (27.7-84.8)

The mean percentage of persons experiencing adverse effects resulting in treatment discontinuation (19% [106/558], CI=16%-22%). The studies were too heterogeneous for random effects aggregation.

### Forest Plot of MDR LTBI TB Treatment Discontinuation due to AE Proportions: 12 Studies

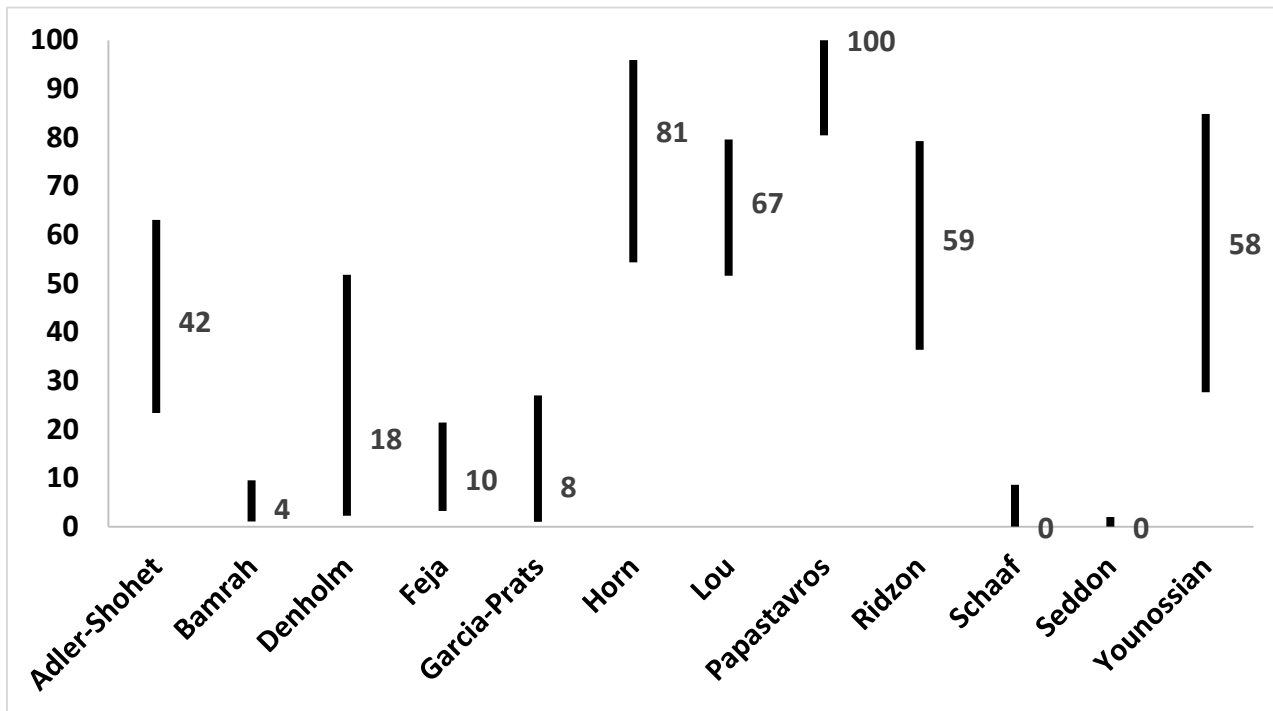

Four studies reported the percentage of persons starting MDR LTBI treatment who discontinued due to adverse effects by age  $\leq 15$  years:

- Adler-Shohet [4]                      11/26=42%    (23.4-63.1)
- Garcia-Prats [9]                      2/24=8%      (1.03-27.0)
- Schaaf [3]                                0/41=0%      (0-8.6)
- Seddon [15]                              0/186=0%     (0-2.0)



## Forest Plot of MDR LTBI TB Treatment Discontinuation due to AE Proportions in 4 Child and 7 Adult Studies

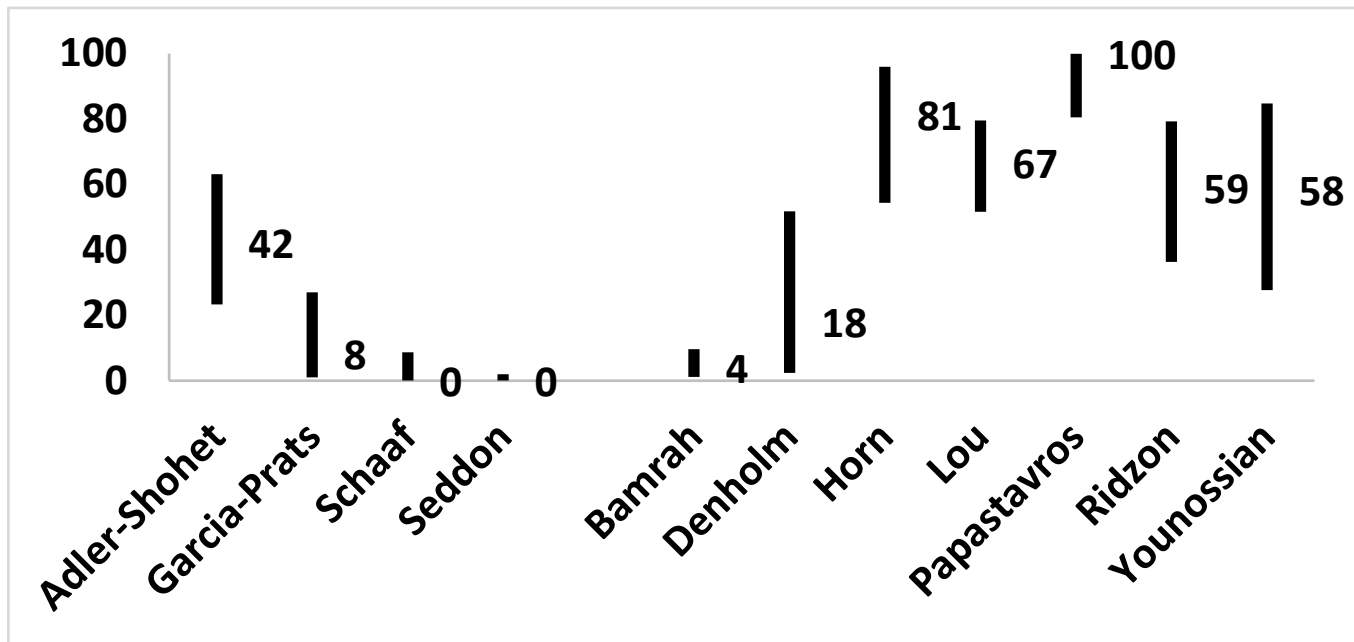

The percentages for completion and AE stop by regimen were obtained from the studies that reported them, computed by placing the number completing or discontinuing treatment due to AE from a specific regimen over the total number that received the regimen.

| Regimen | Completion by study                                                                  | Completed | N   | % Completed   |
|---------|--------------------------------------------------------------------------------------|-----------|-----|---------------|
| PZA/EMB | 3/3 Denholm, 13/13 Schaaf, 5/12 Younossian                                           | 21        | 28  | 75% (57-87)   |
| PZA/FQ  | 15/26 Adler-Shohet, 1/1 Denholm, 2/16 Horn, 13/48 Lou, 0/17 Papastavros, 9/22 Ridzon | 40        | 130 | 31% (23-39)   |
| FQ mono | 41/51 Bamrah, 2/2 Denholm                                                            | 43        | 53  | 81% (69-89)   |
| FQ/EMB  | 37/41 Bamrah, 2/2 Denholm, 21/24 Garcia-Prats, 141/186 Seddon                        | 201       | 253 | 79% (74-84)   |
| FQ/ETA  | 12/12 Bamrah                                                                         | 12        | 12  | 100% (96-100) |

For treatment discontinuation due to adverse effects, data were obtained from the following studies:

| Regimen | AE stop by study                                                                        | AE stop | N   | % AE stop   | Notes                                       |
|---------|-----------------------------------------------------------------------------------------|---------|-----|-------------|---------------------------------------------|
| PZA/EMB | 0/3 Denholm, 0/13 Schaaf, 7/12 Younossian                                               | 7       | 28  | 25% (11-45) | 4 in Schaaf also received ETA               |
| PZA/FQ  | 11/26 Adler-Shohet, 0/1 Denholm, 13/16 Horn, 32/48 Lou, 17/17 Papastavros, 13/22 Ridzon | 86      | 130 | 66% (57-74) | 1 in Denholm received ciprofloxacin and PZA |
| FQ mono | 4/51 Bamrah, 0/2 Denholm                                                                | 4       | 53  | 8% (2-18)   |                                             |

|        |                                                           |   |     |           |                                                 |
|--------|-----------------------------------------------------------|---|-----|-----------|-------------------------------------------------|
| FQ/EMB | 0/41 Bamrah, 0/2 Denholm, 2/24 Garcia-Prats, 0/186 Seddon | 2 | 253 | 1% (0-3)  | all in Garcia-Prats also received high dose INH |
| FQ/ETA | 0/12 Bamrah                                               | 0 | 12  | 0% (0-25) |                                                 |

### Forest Plot of MDR LTBI TB Treatment Discontinuation due to AE Proportions by Regimen

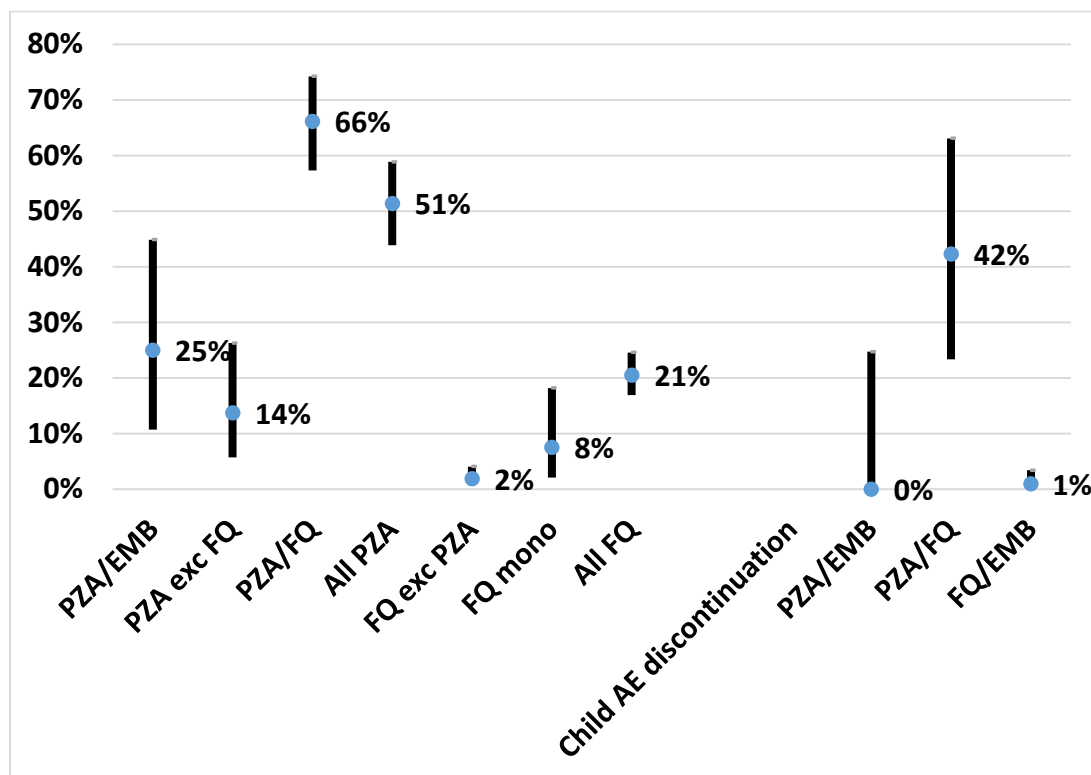

In children  $\leq 15$  years of age, treatment discontinuation due to adverse effects was low with PZA/EMB (0%, 0%-25%) or FQ/EMB (1%, 0%-3%), but high with PZA/FQ (42%, 23%-63%). Consistent with drug-susceptible TB LTBI treatment in trials of children, they are less likely to experience or report adverse effects.

In the Adler-Shohet study of 26 children, most AEs were abdominal pain, arthralgias/myalgias, and elevated liver enzymes. Liver enzymes were five times the upper limit of normal in one patient, and 2-4 times the limit in three patients, so 4/8 or half of those with any liver toxicity. While all AEs resolved after withdrawal of the regimen (5/8 with liver toxicity were switched to FQ monotherapy), the authors noted the following: "Children on these regimens should have transaminases checked monthly and be monitored for new gastrointestinal symptoms or other toxicity." In our paper, the costs are taken from Holland and updated; these costs include monthly lab monitoring and monitoring for AEs.

In Denholm, there was one patient on ciprofloxacin and PZA who initially experienced mild abdominal pain that resolved.

In Horn, the following AEs for the 16 patients on ofloxacin and PZA were common: arthralgias, gastrointestinal distress, hepatitis with elevated ALTs. Of the four with hepatitis, all had taken isoniazid for some period.

In Lou, 48 patients (most having received organ transplants and on immunosuppressive medications) took levofloxacin and PZA and 32 discontinued due to AEs. Two patients discontinued treatment due to elevated transaminase levels. Most other AEs were due to gastrointestinal effects and arthralgias.

In Papastavros, all 17 patients on PZA and levofloxacin discontinued due to AEs. Eight of the 17 discontinued due to elevated liver enzymes. Other common AEs included: gastrointestinal distress, hyperuricemia, CNS issues (dizziness, vertigo, headache, etc.), and arthralgias/myalgias.

In Ridzon, 13/22 patients on PZA and ofloxacin discontinued due to AEs. Seven of the 13 had mild to moderate elevated liver enzymes and two severely elevated levels, as well as two of the nine who completed treatment. One patient developed angioedema resulting in hospitalization.

A FQ/ETA regimen was used in 12 patients less than 18 years of age in Bamrah. Seven experienced AEs (nearly all gastrointestinal), but all continued through completion, so no discontinuations due to AEs. This is a small number of patients from only one study.

Studies often reported multiple regimens targeted to the drug susceptibility pattern of the index case. Limitations included that there was a wide range of treatment discontinuation by regimen.

#### *Power Calculation to Detect MDR TB Incidence in the United States*

In the United States, after the first year a contact was exposed to infectious MDR TB, it would take approximately 3 to 10 years to detect one case of incident MDR-TB disease. Calculations are as follows: Approximately 100 incident MDR TB cases occur per year of which 50 are infectious<sup>35</sup> and have 20 contacts/case<sup>36</sup> = 1000 MDR TB contacts/year, of whom approximately 30%-45% have MDR LTBI.<sup>37, 38, 39</sup> Assume 1.15% of persons with MDR LTBI quickly develop TB within the first year of infection,<sup>40</sup> or about 3 to 5 cases of MDR TB per year that might not be preventable if MDR TB diagnosis of the index case is delayed. The remainder of those with LTBI reactivate to TB at a rate of 0.00032<sup>41</sup> to 0.00084<sup>42</sup> per year for the remaining 39 years of their lives (assuming a normal lifespan of 79 years with 40 remaining years, 1<sup>st</sup> year of high incidence), then we would expect 0.096-0.378 MDR TB reactivation incident cases per year, or approximately 4 to 15 MDR TB cases over the remaining lives of the 300-450 with MDR LTBI. Average TB incidence per person with LTBI is estimated at:

50 MDR TB cases/year X 20 contacts/case = 1000 MDR TB contacts/year

Low annual estimate of MDR LTBI= 1000 X 0.3 =300

High annual estimate of MDR LTBI =1000 X 0.45 = 450

Low estimate of MDR TB fast incidence = 300 X 0.0115 ~ 3

High estimate of MDR TB fast incidence = 450 X 0.0115 ~ 5

Low estimate of MDR TB reactivation incidence per year = 300 X 0.00032 = .096

High estimate of MDR LTBI reactivation incidence = 450 X .00084 = .378

Low estimate of average MDR TB incidence per year of remaining life = (300 X (0.0115 + 39\*(0.00032)))/40 = 0.18

High estimate of average MDR TB incidence per year of remaining life = (450 X (0.0115 + 39\*(0.00084)))/40 = 0.50

1/0.50 ~ 2 years for incident MDR TB

1/0.18 ~ 5.5 years for incident MDR TB

Figure 1: Decision Tree



## References

1. Bamrah S, Brostrom R, Fred D, et al. Treatment for Multidrug-Resistant Latent Tuberculosis Infection—Federated States of Micronesia, 2009–2012. *International Journal of TB and Lung Disease*. 2014; 18(8): 912-919.
2. Denholm JT, Leslie DE, Jenkin GA, et al. Long-term follow-up of contacts exposed to multidrug-resistant tuberculosis in Victoria, Australia, 1995-2010. *International Journal of TB and Lung Disease*. 2012; 16(10): 1320-5.
3. Schaaf et al. Evaluation of Young Children in Contact with Adult Multidrug-resistant Pulmonary Tuberculosis: A 30-month Follow-up. *Pediatrics*. 2002; 109: 765-771.
4. Adler-Shohet et al. Management of Latent Tuberculosis Infection in Child Contacts of Multidrug-resistant Tuberculosis. *Pediatric Infectious Disease Journal*. 2014; 33: 664.
5. Attamna A, Chemtob D, Attamna S, et al. Risk of tuberculosis in close contacts of patients with multidrug resistant tuberculosis: a nationwide cohort. *Thorax*. 2009; 64(3): 271.
6. Williams B, Ramroop S, Shah P, et al. Management of Pediatric Contacts of Multidrug Resistant Tuberculosis in the United Kingdom, *The Pediatric Infectious Disease Journal*. 2013; 32: 926-7.
7. Feja K, McNelley E, Tran C S, et al. Management of pediatric multidrug-resistant tuberculosis and latent tuberculosis infections in New York City from 1995 to 2003. *The Pediatric Infectious Disease Journal*. 2008; 27: 907–912.
8. Freier G, Wright A, Nelson G et al. Multidrug-resistant tuberculosis in military recruits. *Emerging Infectious Diseases*. 2006; 12(5): 760-2.
9. Garcia-Prats AJ, Zimri K, Mramba Z, et al. Children exposed to multidrug-resistant tuberculosis at a home-based day care centre: a contact investigation. *International Journal of TB and Lung Disease*. 2014; 18 (11): 1292-98.
10. Horn DL, Hewlett D Jr, Alfalla C, et al. Limited tolerance of ofloxacin and pyrazinamide prophylaxis against tuberculosis. *New England Journal of Medicine*. 1994; 330(17):1241.
11. Lou H X, Shullo M A, McKaveney T P. Limited tolerability of levofloxacin and pyrazinamide for multidrug-resistant tuberculosis prophylaxis in a solid organ transplant population. *Pharmacotherapy*. 2002; 22: 701–704.
12. Miramontes R, Lambert L, Haddad MB, et al. Public health response to a multidrug-resistant tuberculosis outbreak among Guatemalans in Tennessee, 2007. *Southern Medical Journal*. 2010; 103(9): 882-6.

13. Papastavros T, Dolovich LR, Holbrook A, et al. Adverse events associated with pyrazinamide and levofloxacin in the treatment of latent multidrug-resistant tuberculosis. *Canadian Medical Association Journal*. 2002; 167(2): 131–136.
14. Ridzon R, Meador J, Maxwell R, et al. Asymptomatic hepatitis in persons who received alternative preventive therapy with pyrazinamide and ofloxacin. *Clinical Infectious Diseases*. 1997; 24(6): 1264-5.
15. Seddon JA, Hesselning AC, Finlayson H, et al. Preventive therapy for child contacts of multidrug-resistant tuberculosis: a prospective cohort study. *Clinical Infectious Diseases*. 2013; 57: 1676
16. Younossian AB, Rochat T, Ketterer JP, Wacker J, Janssens JP. High hepatotoxicity of pyrazinamide and ethambutol for treatment of latent tuberculosis. *European Respiratory Journal*. 2005; 26(3): 462-4.
17. Amanullah F, Ashfaq M, Khowaja S, et al. High tuberculosis prevalence in children exposed at home to drug-resistant tuberculosis. *International Journal of TB and Lung Disease*. 2014; 18:520.
18. Bayona J, Chavez-Pachas AM, Palacios E, et al. Contact Investigations as a Means of Detection and Timely Treatment of Persons with Infectious Multidrug-resistant Tuberculosis. *International Journal of TB and Lung Disease*. 2003; 7(12): S501–S509.
19. Becerra MC, Franke MF, Appleton SC, et al. Tuberculosis in Children Exposed at Home to Multidrug-resistant Tuberculosis. *The Pediatric Infectious Disease Journal*. 2013; 32: 115.
20. Kritski AL, Marques MJ, Rabahi MF, et al. Transmission of tuberculosis to close contacts of patients with multidrug-resistant tuberculosis. *American Journal of Respiratory and Critical Care Medicine*. 1996; 153(1): 331-5.
21. Nitta AT, Knowles LS, Kim J, et al. Limited transmission of multidrug-resistant tuberculosis despite a high proportion of infectious cases in Los Angeles County, California. *American Journal of Respiratory and Critical Care Medicine*. 2002; 165(6): 812-7.
22. Pineiro Perez R, Mellado Pena MJ, Mendez Echevarria A, et al. Exposicion a tuberculosis multirresistente: estudio y seguimiento de nueve ninos. *Anales de Pediatria (Barc)*. 2008; 68(5): 490-5.
23. Holland DP, Sanders GD, Hamilton CD, Stout JE. Strategies for Treating Latent Multiple-Drug Resistant Tuberculosis: A Decision Analysis. *PLoS One*. 2012;7: e30194–e30194.
24. Fox GJ, Oxlade O, Menzies D. Fluoroquinolone Therapy for the Prevention of Multidrug-Resistant Tuberculosis in Contacts: A Cost-Effectiveness Analysis. *Am J Respir Crit Care Med*. 2015;192 (2):229–237.
25. Centers for Disease Control and Prevention. Reported Tuberculosis in the United States, 2013. Atlanta, GA, USA: US Department of Health and Human Services, CDC, 2014.
26. Young KH, Ehman M, Reves R, et al. Tuberculosis Contact Investigations — United States, 2003–2012. *MMWR Morbidity and Mortality Weekly Report*. 2016; 64 (50 & 51):1369-1374.

27. Nuermberger E, Tyagi S, Williams KN, et al. Rifapentine, Moxifloxacin, or DNA Vaccine Improves Treatment of Latent Tuberculosis in a Mouse Model. *American Journal of Respiratory and Critical Care Medicine*. 2005; 172: 1452-1456.
28. Saukkonen JJ, Cohn DL, Jasmer RM. et al. An Official ATS Statement: Hepatotoxicity of Antituberculosis Therapy. *American Journal of Respiratory and Critical Care Medicine*. 2006; 174: 935-952.
29. Castro KG, Marks SM, Chen MP, Hill AN, Becerra JE, Miramontes R, Winston CA, Navin TR, Pratt RH, Young KH, LoBue PA. Estimating tuberculosis cases and their economic costs averted in the United States over the past two decades. *International Journal of Tuberculosis and Lung Disease*. 2016; 20(7):926–933.
30. CDC Wonder. Multiple Cause of Death Statistics, 2014. <http://wonder.cdc.gov/controller/datarequest/D77> accessed 3/1/2016. Weighted average by age group.
31. Yeats J, Baker B, Basurto-Davila R. Priorities for Targeted Testing for Latent Tuberculosis Infection among Foreign-Born Adults in the United States. Doctoral Dissertation. 2015. [http://www.rand.org/content/dam/rand/pubs/rgs\\_dissertations/RGSD300/RGSD356/RAND\\_RGSD356.pdf](http://www.rand.org/content/dam/rand/pubs/rgs_dissertations/RGSD300/RGSD356/RAND_RGSD356.pdf) accessed 4/14/2016.
32. Shea DM, Kammerer JS, Winston CA, Navin TR, Horsburgh CR. *American Journal of Epidemiology*. 2014;179(2):216-225.
33. Bureau of Labor Statistics. Consumer Price Index—all urban consumers, medical care. Series ID CUUR0000SAM. <http://data.bls.gov/cgi-bin/srgate>. Accessed January 2016.
34. Guo N, Marra CA, Marra F, et al. Health State Utilities in Latent and Active Tuberculosis. *Value in Health*. 2008; 11(7): 1154-1161.
35. Centers for Disease Control and Prevention. Reported Tuberculosis in the United States, 2014. Atlanta, GA, USA: US Department of Health and Human Services, CDC, 2015.
36. Young, Ehman, Reves et al. Tuberculosis Contact Investigations—United States, 2003-2012. *Morbidity and Mortality Weekly Report*. 2016; 64 (50):1369-1374.
37. Anger HA, Proops D, Harris TG, Li J, Kreiswirth BN, Shashkina E, Ahuja SD. Active case finding and prevention of tuberculosis among a cohort of contacts exposed to infectious tuberculosis cases in New York City. *Clin Infect Dis*. 2012; 54(9):1287-95.
38. Marks SM, Taylor Z, Qualls NL, Shrestha-Kuwahara RJ, Wilce MA, Nguyen CH. Outcomes of contact investigations of infectious tuberculosis patients. *Am J Respir Crit Care Med*. 2000; 162(6):2033-8.



39. Shah NS, Yuen CM, Heo M, Tolman AW, Becerra MC. Yield of contact investigations in households of patients with drug-resistant tuberculosis: systematic review and meta-analysis. *Clinical Infectious Diseases*. 2014; 58 (3): 381-391.
40. Ferebee SH. Controlled chemoprophylaxis trials in tuberculosis. A general review. *Bibl Tuberc*. 1970; 26:28-106.
41. Walter ND, Painter J, Parker M, Lowenthal P, Flood J, Fu Y, Asis R, Reves R; Tuberculosis Epidemiologic Studies Consortium. Persistent latent tuberculosis reactivation risk in United States immigrants. *Am J Respir Crit Care Med*. 2014; 189(1):88-95.
42. Shea KM, Kammerer JS, Winston CA, Navin TR, Horsburgh CR Jr. Estimated rate of reactivation of latent tuberculosis infection in the United States, overall and by population subgroup. *Am J Epidemiol*. 2014; 179(2):216-25.
